# Supplementary material
Source: Springer Nature journal article supplement (https://www.springermedizin.de/resource/supplementary/12876_2010_487_MOESM5_ESM.pdf/9437130)

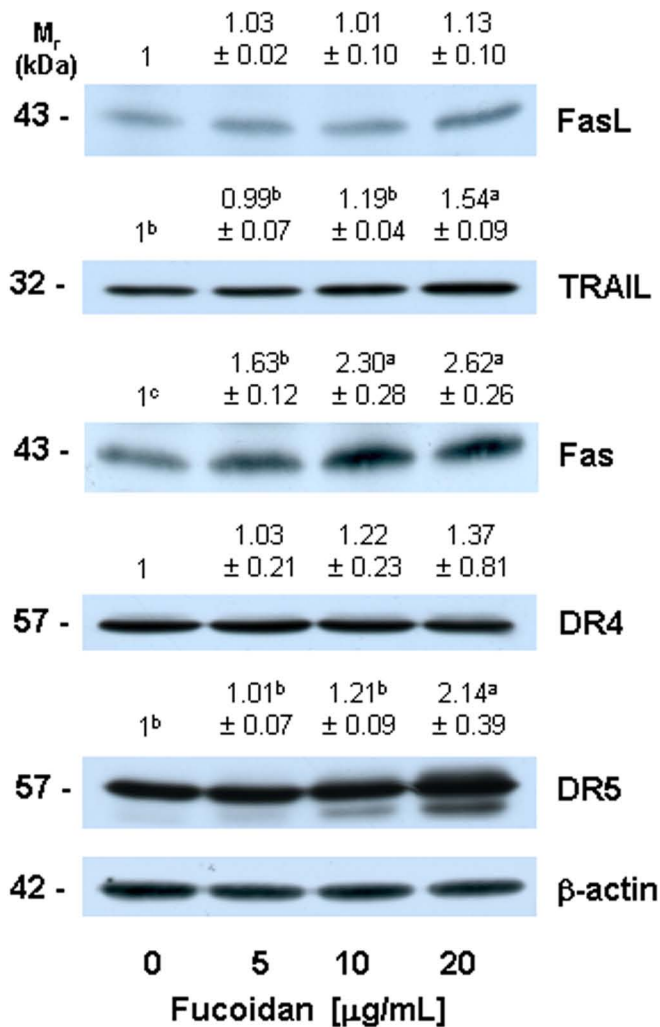

Supplement: MOESM5 [file 9437130]
